# Supplementary material for: Long-lifespan lithium–metal batteries obtained using a perovskite intercalation layer to stabilize the lithium electrode
Source: Royal Society of Chemistry journal article supplement (doi:10.1039/d0ta02061c), 2020-01-01
Supplement: d0ta02061c1.pdf [file d0ta02061c1.pdf]

## Long-Lifespan Lithium-Metal Batteries Obtained Using Perovskite Intercalation Layer to Stabilize Lithium Electrode

Nahid Kaiser<sup>1,3</sup>, Anupriya Singh<sup>2,3</sup>, Po-Yu Yang<sup>3</sup>, Yu-Ting Chen<sup>3</sup>, Shenghan Li<sup>3</sup>, Chun-Wei Pao<sup>3</sup>, Shankay Jou<sup>1,\*</sup>, Chih-Wei Chu<sup>3,\*</sup>

<sup>1</sup>Department of Materials Science and Engineering, National Taiwan University of Science and Technology, Taipei, Taiwan.

E-mail: [sjou@mail.ntust.edu.tw](mailto:sjou@mail.ntust.edu.tw)

<sup>2</sup>Department of Physics, National Taiwan University, Taipei, Taiwan

<sup>3</sup>Research Center for Applied Sciences, Academia Sinica, Taipei, Taiwan

E-mail address: [gchu@gate.sinica.edu.tw](mailto:gchu@gate.sinica.edu.tw)

\*Corresponding authors

**Keywords:** Intercalation Chemistry, Perovskite, Lithium dendrite, Lithium anode, Li-S battery.

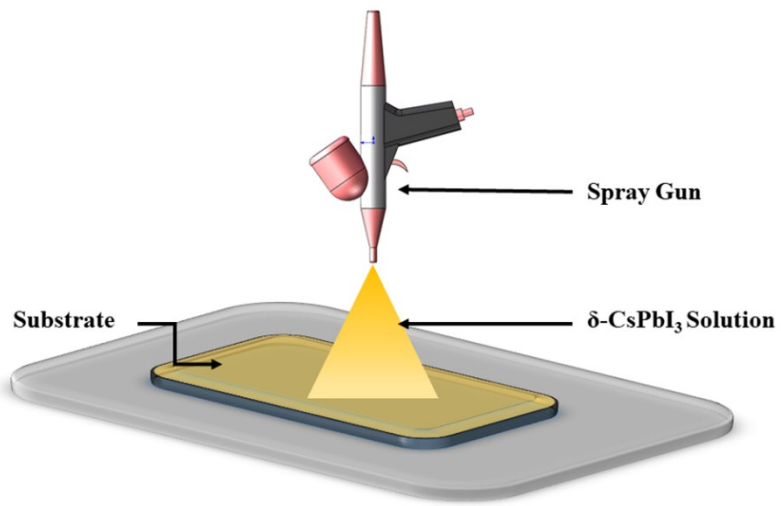

Fig. S1 Schematic representation of Spray-coating of CsPbI<sub>3</sub> using spray gun.

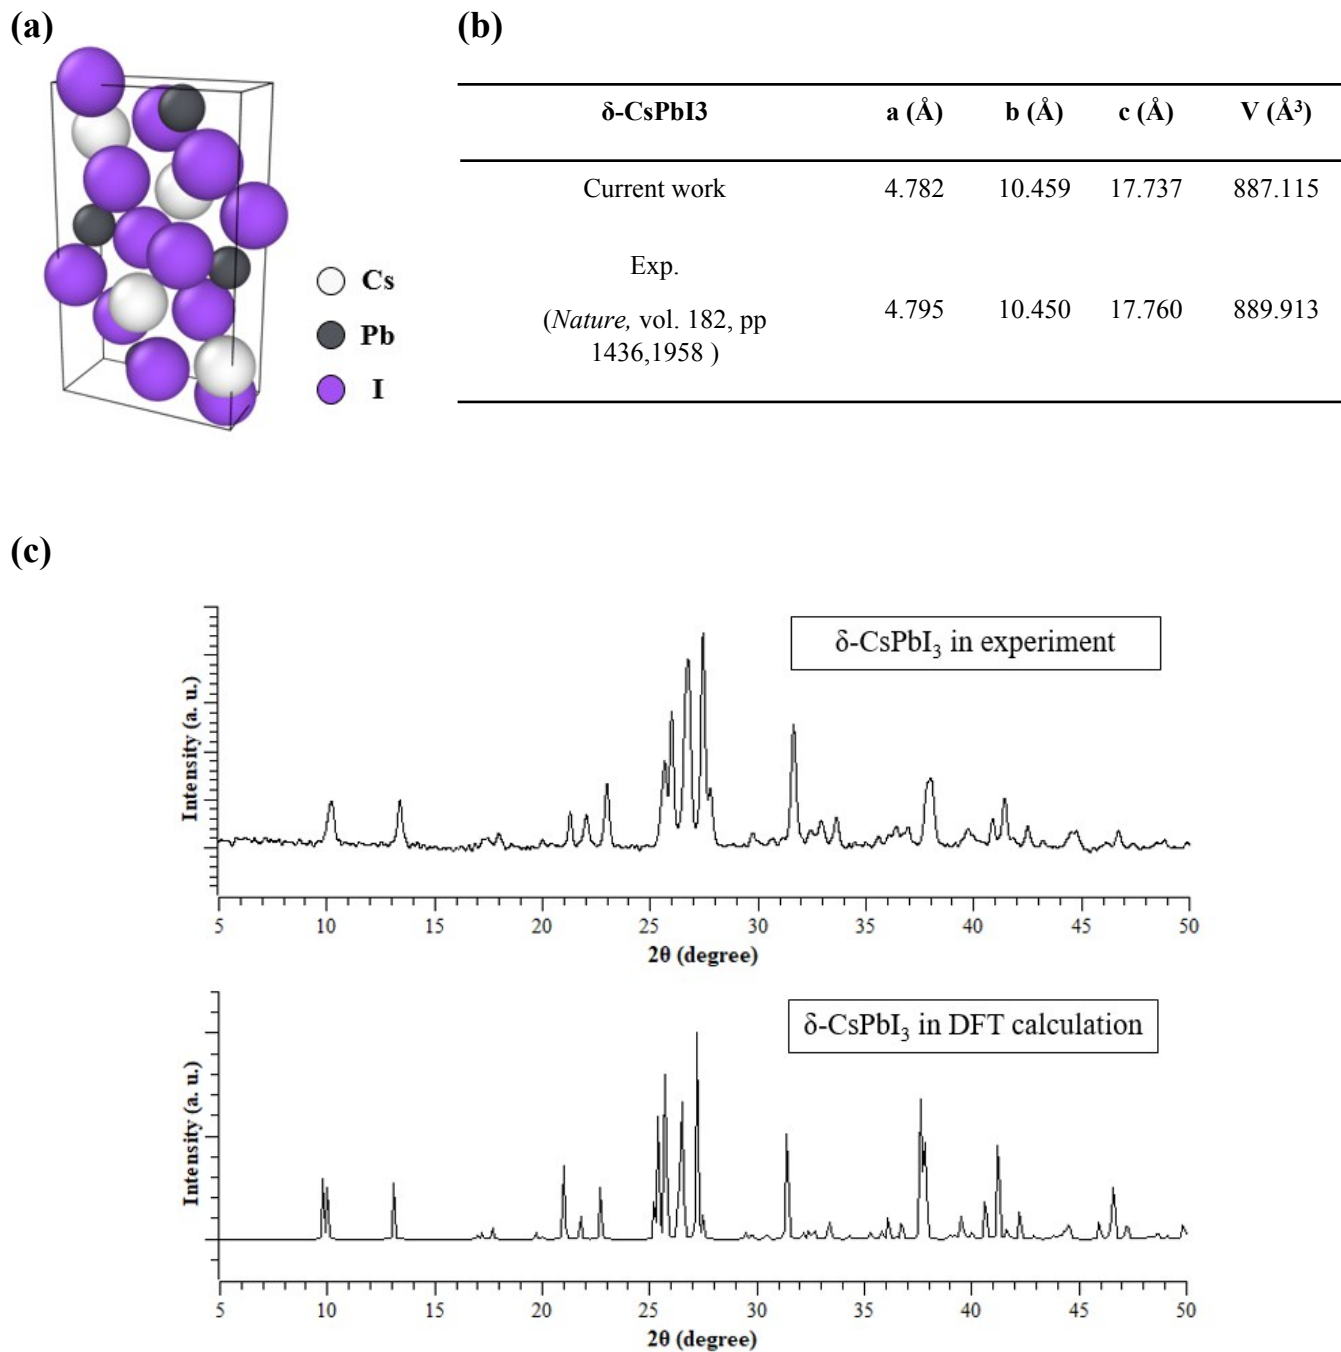

**Fig. S2** a) Fully optimized structure of  $\delta$ -CsPbI<sub>3</sub>. b) DFT-predicted lattice parameters and unit cell volume of  $\delta$ -CsPbI<sub>3</sub> determined in this present study, and compared with the previously reported experimental data. c) Experimentally measured and simulated of XRD patterns of  $\delta$ -CsPbI<sub>3</sub>.

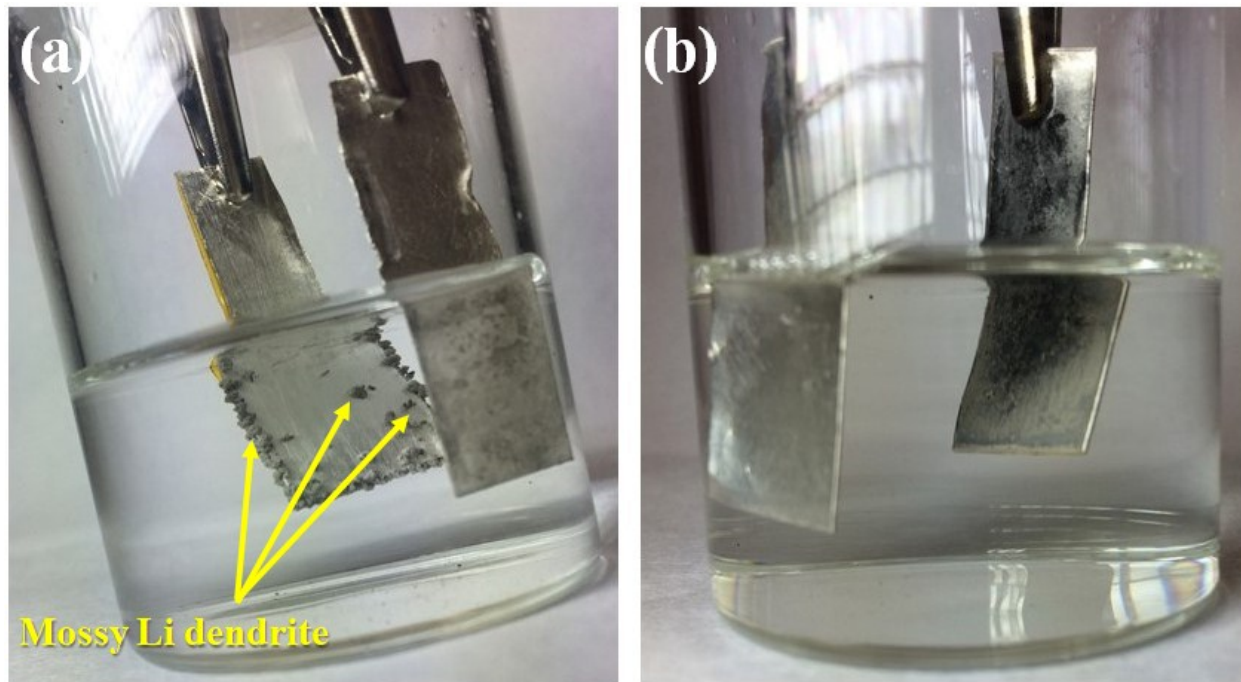

**Fig. S3** Photographs of transparent cells of a) pristine Li and b)  $\delta$ -CsPbI<sub>3</sub>-coated Li after overpotential measurements.

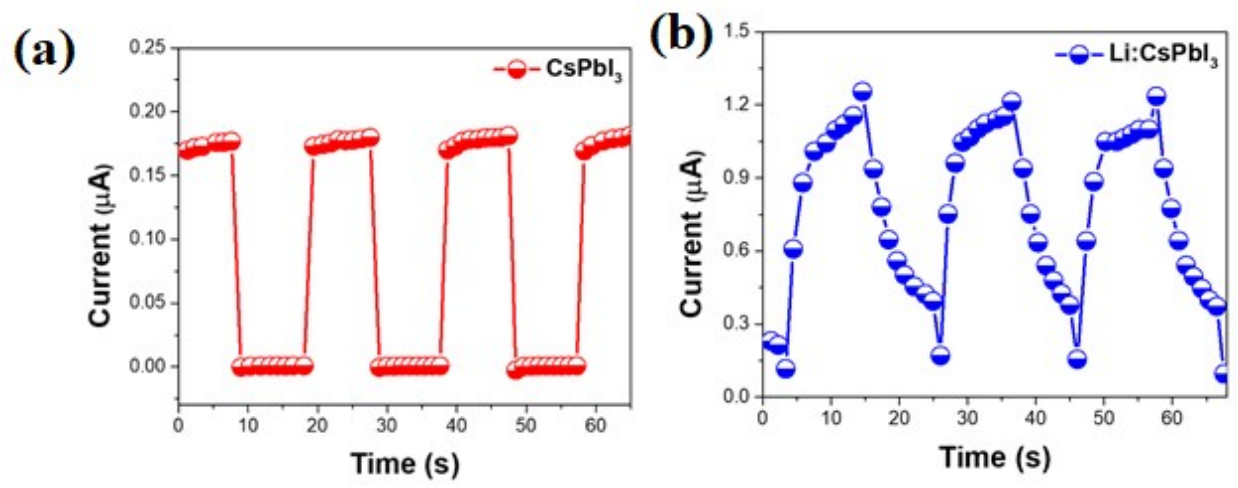

**Fig. S4** Current vs time measurement of a) pristine  $\delta$ -CsPbI<sub>3</sub> and b) Li:CsPbI<sub>3</sub> under white light.

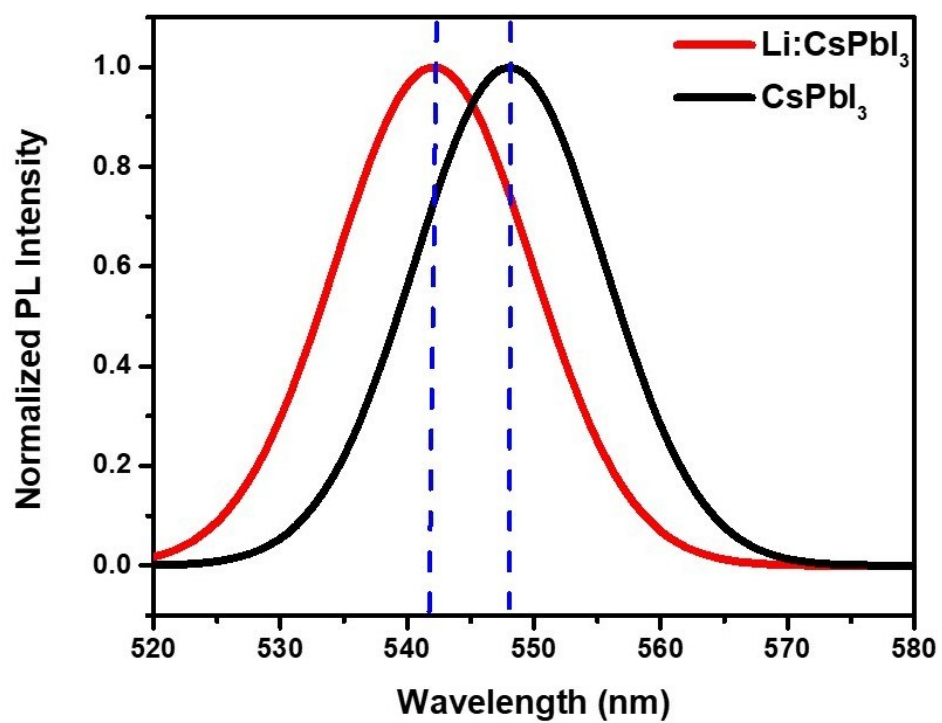

Fig. S5 PL spectra of pristine CsPbI<sub>3</sub> and Li:CsPbI<sub>3</sub>.

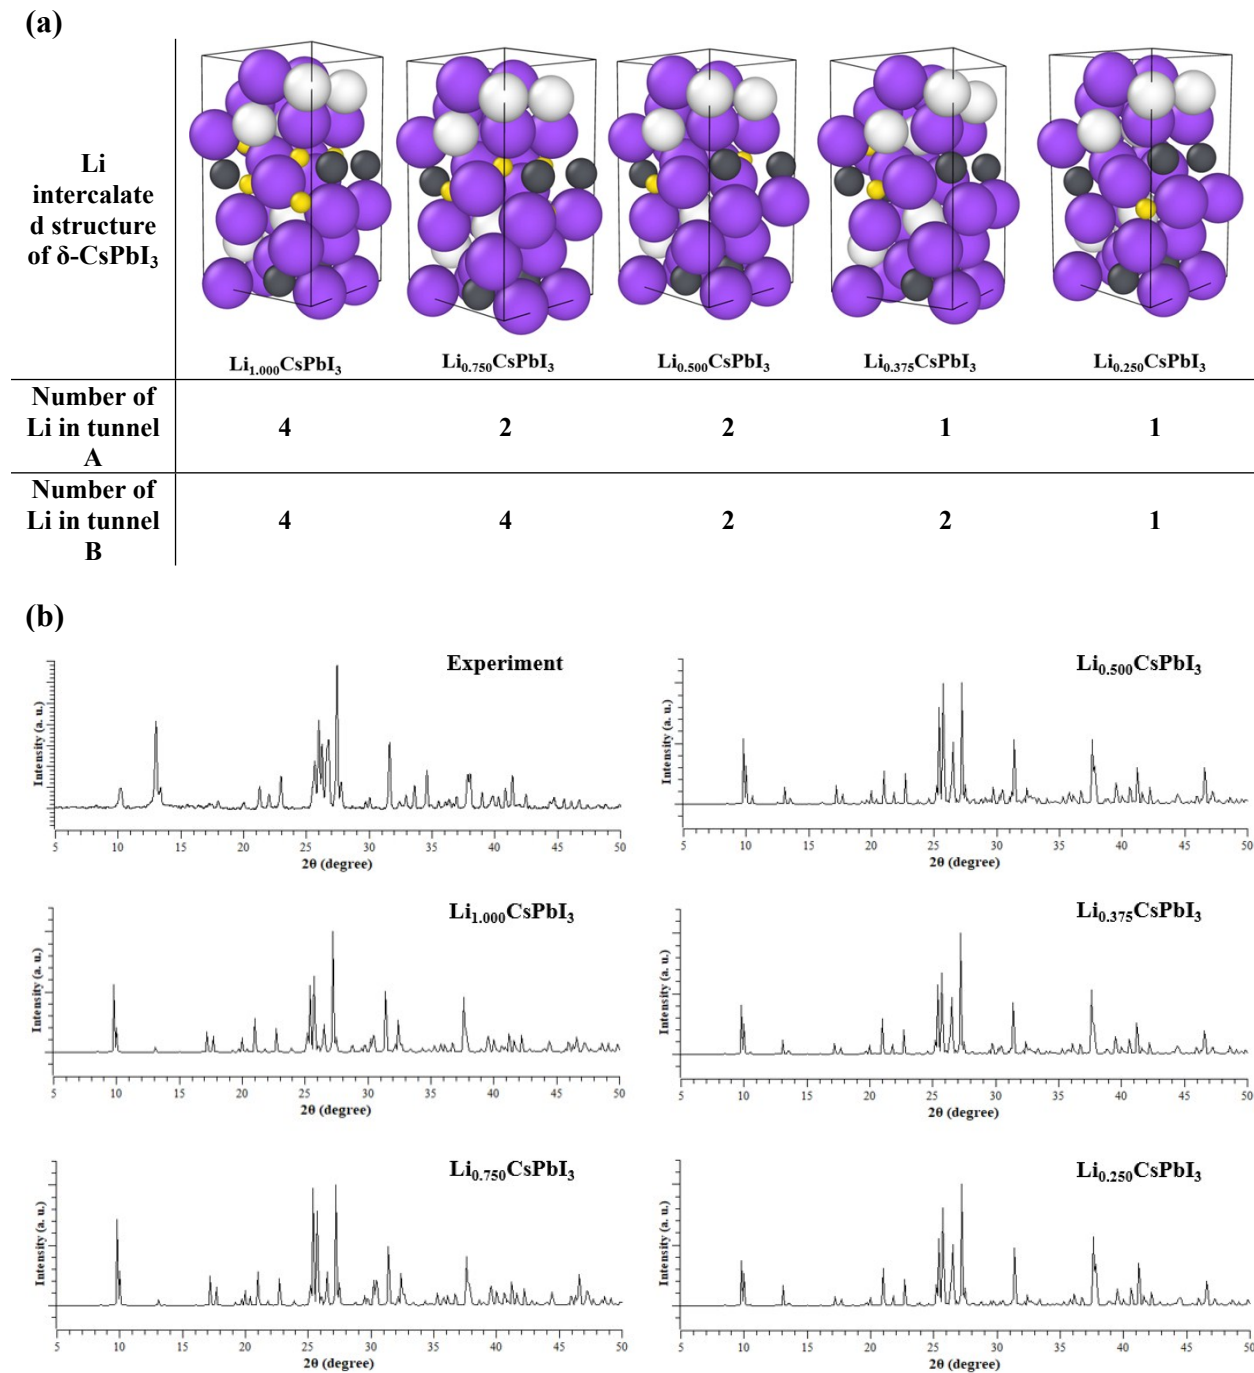

**Fig. S6** (a) Stable structures of  $\delta$ -CsPbI<sub>3</sub> featuring various ratios of intercalated Li atoms; the table lists the number of intercalated Li atoms located in tunnels A and B. (b) Experimentally measured and simulated of XRD patterns of Li-intercalated  $\delta$ -CsPbI<sub>3</sub>.

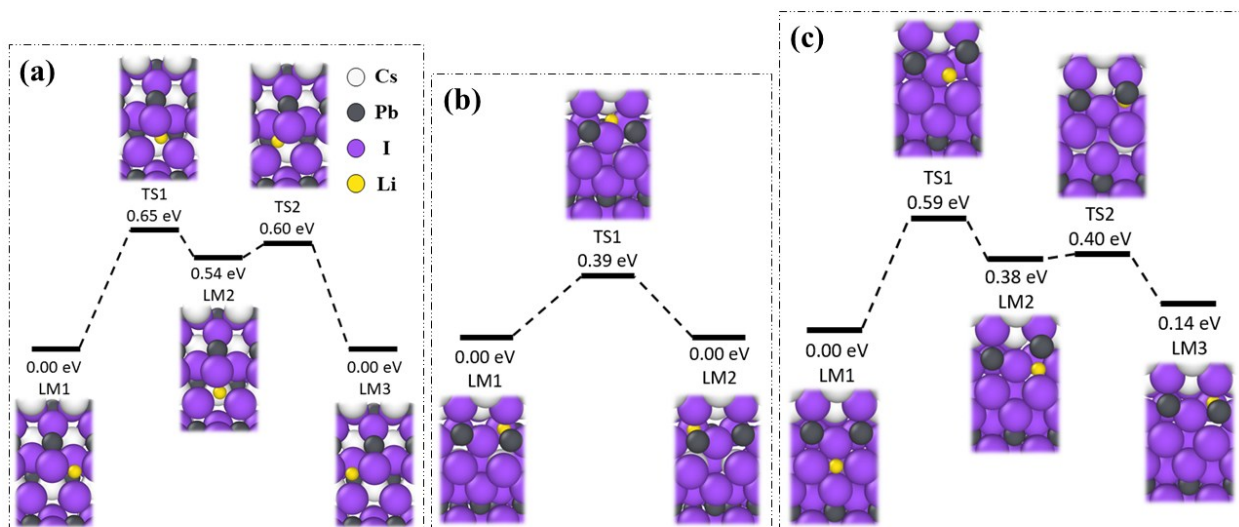

**Fig. S7** Relative energy profile of Li diffusion pathways: a) in tunnel A, b) in tunnel B, and c) from tunnel A to B.



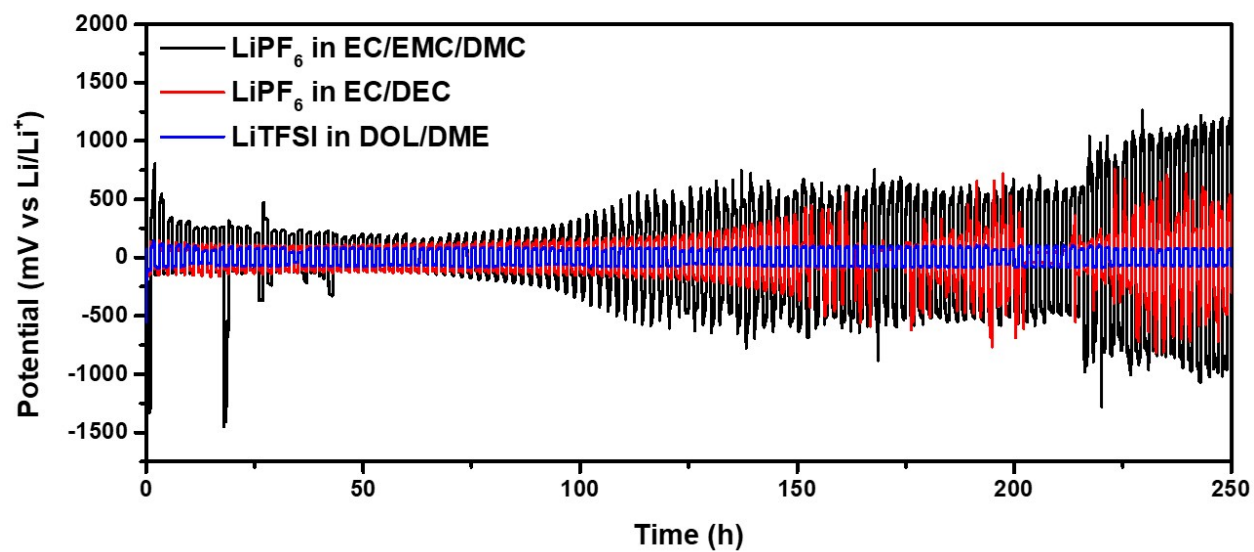

**Fig. S8** Electrochemical performance of  $\delta$ -CsPbI<sub>3</sub> in various electrolytes, recorded at a current density of 1 mA cm<sup>-2</sup> and a discharge capacity of 1 mA h cm<sup>-2</sup>.

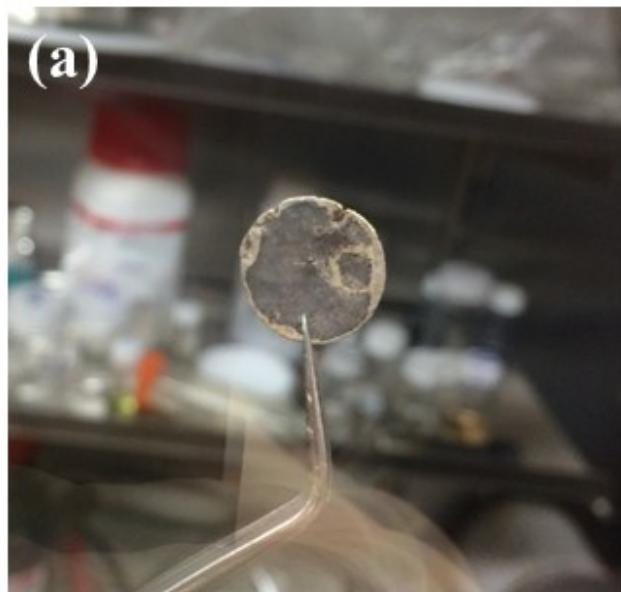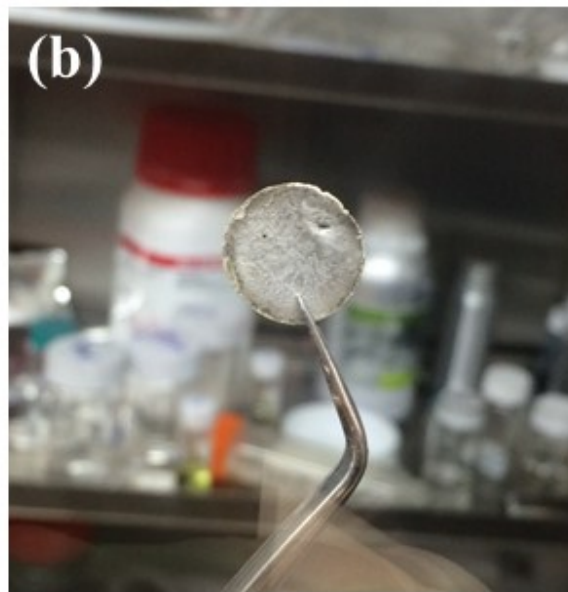

**Fig. S9** Photographs of CsPbI<sub>3</sub>-coated Li samples prepared after dissolving CsPbI<sub>3</sub> (a) in DMF/DMSO and (b) DMF.

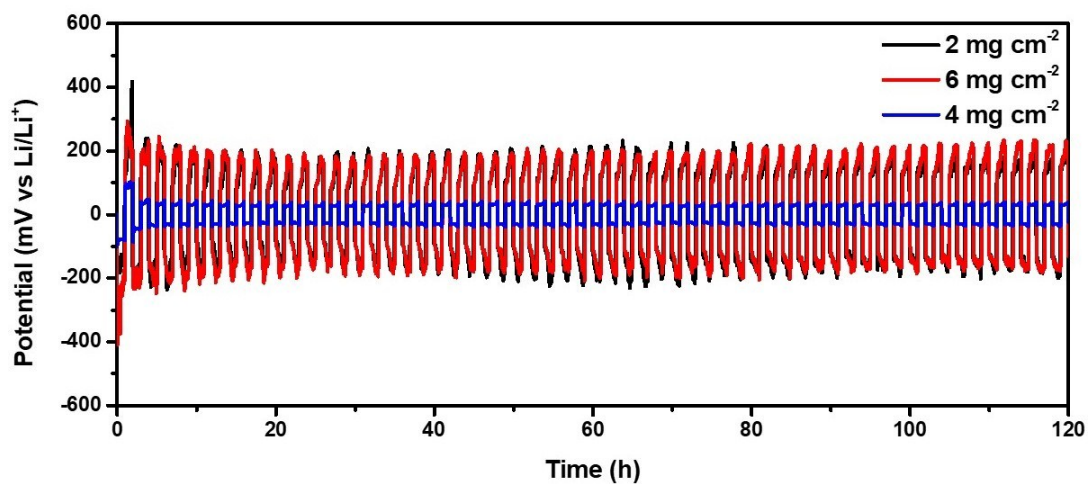

**Fig. S10** Electrochemical performance of  $\delta$ -CsPbI<sub>3</sub> at various loadings on Li substrates, recorded at a current density of 1 mA cm<sup>-2</sup> and a discharge capacity of 1 mA h cm<sup>-2</sup>.

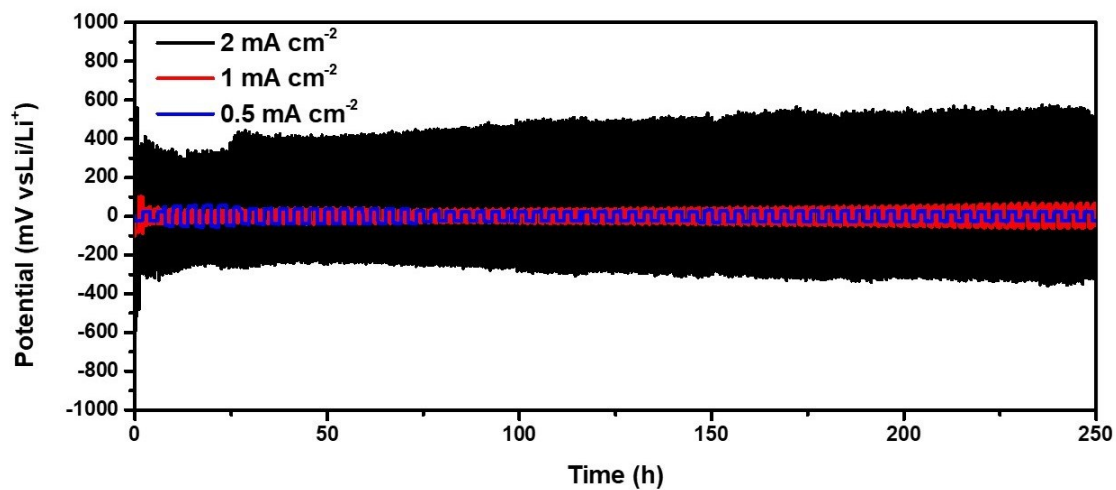

**Fig. S11** Electrochemical performance of Li:CsPbI<sub>3</sub>, recorded at various current densities.

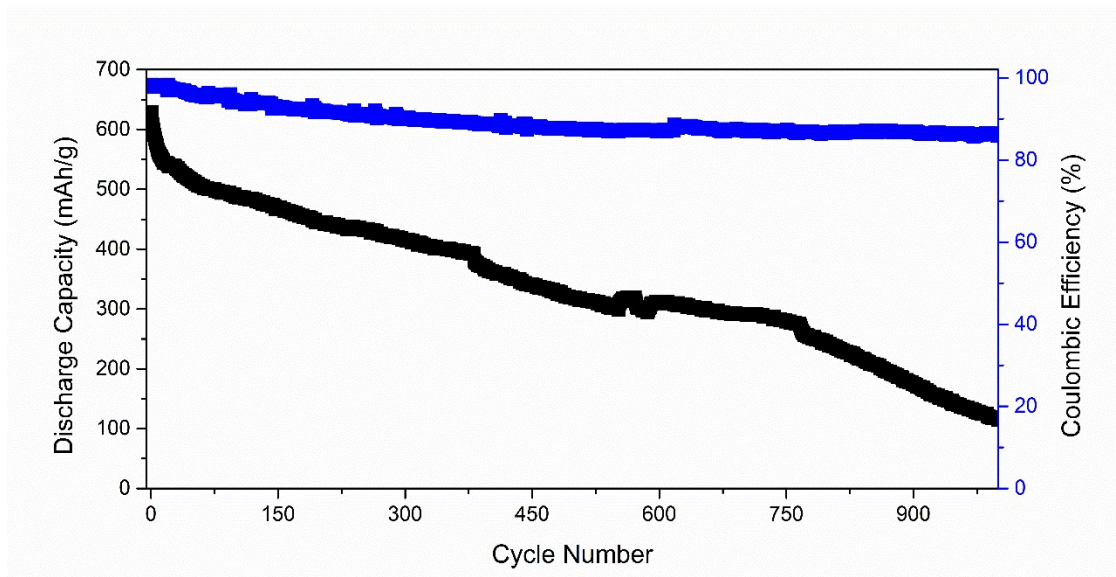

**Fig. S12** Cycling performance of a Li–S battery featuring pristine Li and a separator, recorded at a 1C rate ( $1C = 175 \text{ mA h g}^{-1}$ ).
